# Supplementary material for: Depression, distress and self-efficacy: The impact on diabetes self-care practices
Source: PLoS One. 2017 Mar 31;12(3):e0175096. doi: 10.1371/journal.pone.0175096 (PMC5376339; doi:10.1371/journal.pone.0175096)
Supplement: S1 File — (XLSX) [file pone.0175096.s001.xlsx]

## Sheet: Sheet1
			NO	AGE	60 AND OLDER	SEX	ETHNIC	YEARS (DM)	EDU LEVEL		BIGUANIDE	SULPHONYUREA	ACARBOSE	GLITAZONE	INSULIN		RETINOPATHY	IHD	STROKE	NEPHROPATHY		NUMBER OF COMPLICATIONS	COMPLICATION STATUS		EMO-DDS1	EMO-DDS3	EMO-DDS8	EMO-DDS11	EMO-DDS14	PHY-DDS2	PHY-DDS4	PHY-DDS9	PHY-DDS15	REG-DDS5	REG-DDS6	REG-DDS10	REG-DDS12	REG-DDS16	INT-DDS7	INT-DDS13	INT-DDS17	DDS SCORE	DISTRESS		PHQ SOCRE	DEPRESSION		DMSE SCORE
EMO DDS = EMOTIONAL BURDEN			1	63	old	female	Indian	8	primary		Yes	Yes	No	No	Yes		No	No	No	No		0	no_complication		2	4	2	1	3	1	1	1	2	1	3	1	2	1	3	3	1	1.88	NO		7	NO		126
PHY DDS = PHYSICIAN RELATED DISTRESS			2	53	young	female	Indian	2	primary		Yes	Yes	No	No	Yes		No	No	No	No		0	no_complication		2	2	2	1	1	1	1	1	1	2	2	1	1	1	1	1	1	1.29	NO		12	DEPRESSION		104
REG DDS = REGIMEN RELATED DISTRESS			3	61	old	female	Malay	2	primary		Yes	No	No	No	Yes		No	No	No	No		0	no_complication		2	2	2	1	1	1	2	1	1	2	2	1	1	1	2	1	1	1.41	NO		4	NO		127
INT DDS = INTERPERSONAL DISTRESS			4	52	young	female	Malay	6	secondary		No	Yes	No	No	Yes		No	No	No	No		0	no_complication		2	3	1	2	2	1	1	1	1	1	1	2	2	2	1	2	1	1.53	NO		5	NO		95
DDS = DIABETES DISTRESS			5	63	old	female	Malay	2	secondary		Yes	Yes	No	No	Yes		No	No	No	No		0	no_complication		2	1	2	1	1	2	1	1	1	1	2	1	1	1	2	1	1	1.29	NO		6	NO		108
DMSE = SELF-EFFICACY			6	52	young	female	Malay	2	primary		Yes	No	No	No	Yes		No	No	No	No		0	no_complication		3	2	2	1	1	1	2	1	1	2	1	1	1	1	1	1	1	1.35	NO		8	NO		14
PHQ = DEPRESSION			7	49	young	female	Malay	2	primary		No	No	No	No	Yes		No	No	No	No		0	no_complication		2	3	1	2	1	2	1	1	1	1	1	1	2	1	1	1	1	1.35	NO		6	NO		89
SDSCA = SELF-CARE PRACTICE			8	59	young	female	Malay	9	primary		Yes	Yes	No	No	Yes		No	No	No	No		0	no_complication		2	1	2	1	1	1	2	1	1	2	1	1	1	1	1	1	1	1.24	NO		6	NO		105
FOOT = FOOT CARE PRACTICE			9	60	old	male	Malay	3	primary		Yes	Yes	No	No	Yes		Yes	No	No	No		1	yes_complication		2	2	1	2	1	1	1	2	1	2	1	2	2	2	1	1	2	1.53	NO		2	NO		118
SMBG = SELF MONITORINGG OF BLOOD GLUCOSE PRACTICE			10	63	old	female	Indian	9	primary		Yes	No	No	No	Yes		No	No	No	No		0	no_complication		2	2	2	2	2	2	2	2	2	2	2	2	2	2	2	2	2	2	NO		7	NO		140
DIET = DIET PRACTICE			11	52	young	female	Indian	8	primary		Yes	No	No	No	Yes		No	No	No	No		0	no_complication		1	2	1	1	2	1	2	1	1	2	1	1	2	2	1	2	1	1.41	NO		1	NO		117
EXERCISE = EXERCISE PRACTICE			12	35	young	female	Indian	2	primary		Yes	No	No	No	Yes		No	No	No	No		0	no_complication		4	4	1	2	2	4	4	4	1	1	4	3	4	1	2	1	1	2.53	NO		7	NO		132
MEDS = MEDICATION ADHERENCE PRACTICE			13	51	young	male	Malay	10	primary		Yes	Yes	No	No	Yes		No	No	No	No		0	no_complication		3	2	2	3	3	1	1	1	1	3	1	2	3	2	1	1	1	1.82	NO		12	DEPRESSION		130
			14	54	young	female	Malay	3	primary		Yes	Yes	No	No	Yes		No	No	No	No		0	no_complication		2	5	1	1	2	2	1	1	1	2	2	2	1	1	1	1	1	1.59	NO		16	DEPRESSION		99
			15	47	young	male	Malay	2	tertiary		Yes	Yes	No	No	Yes		No	No	No	No		0	no_complication		3	2	1	1	2	3	2	1	1	2	2	1	2	1	1	1	1	1.59	NO		6	NO		140
			16	51	young	female	Indian	8	primary		Yes	No	No	No	Yes		No	No	No	No		0	no_complication		2	2	2	2	2	2	2	1	2	2	2	1	2	2	2	2	2	1.88	NO		3	NO		140
			17	49	young	male	Malay	2	tertiary		Yes	No	No	No	Yes		No	No	No	No		0	no_complication		5	2	2	2	2	1	2	1	1	1	2	2	2	2	1	2	2	1.88	NO		12	DEPRESSION		43
			18	61	old	male	Malay	10	primary		Yes	Yes	No	No	Yes		No	No	No	No		0	no_complication		2	2	2	2	2	1	1	2	2	1	1	2	2	2	1	2	2	1.71	NO		6	NO		127
			19	62	old	female	Malay	8	primary		Yes	No	No	No	Yes		No	No	No	No		0	no_complication		2	2	1	2	2	2	2	2	2	1	1	2	2	2	1	2	2	1.76	NO		4	NO		140
			20	48	young	male	Malay	2	secondary		Yes	Yes	No	No	Yes		No	No	No	No		0	no_complication		2	2	2	2	1	4	1	2	1	3	3	1	3	1	2	2	2	2	NO		3	NO		112
			21	48	young	female	Malay	2	secondary		Yes	No	No	No	Yes		No	No	No	No		0	no_complication		2	1	1	1	5	2	1	2	5	2	1	2	2	2	1	2	2	2	NO		6	NO		102
			22	72	old	female	Malay	8	primary		Yes	Yes	No	No	Yes		No	Yes	No	No		1	yes_complication		4	4	4	3	2	1	1	2	4	3	2	3	2	2	2	2	2	2.53	NO		14	DEPRESSION		55
			23	64	old	female	Indian	6	secondary		Yes	No	No	No	Yes		No	No	No	No		0	no_complication		2	2	2	2	2	1	1	2	2	1	1	1	2	2	1	2	2	1.65	NO		4	NO		140
			24	52	young	female	Chinese	8	primary		Yes	Yes	No	No	Yes		Yes	No	No	No		1	yes_complication		2	2	2	1	1	1	1	1	1	1	1	2	1	1	2	1	1	1.29	NO		6	NO		140
			25	36	young	female	Malay	2	secondary		Yes	Yes	No	No	Yes		No	No	No	No		0	no_complication		1	2	1	1	1	1	1	1	1	1	1	1	1	1	1	1	1	1.06	NO		5	NO		117
			26	51	young	female	Malay	6	secondary		No	No	No	No	Yes		No	No	No	No		0	no_complication		2	2	2	1	2	2	1	2	2	1	1	2	1	1	2	1	1	1.53	NO		2	NO		107
			27	49	young	male	Malay	2	secondary		Yes	Yes	No	No	Yes		No	No	No	No		0	no_complication		3	2	2	4	3	3	3	3	3	3	3	3	3	3	3	4	3	3	DISTRESS		8	NO		122
			28	56	young	female	Malay	10	secondary		No	No	No	No	Yes		No	No	No	No		0	no_complication		2	2	2	2	2	1	2	2	2	2	2	2	2	2	2	2	2	1.94	NO		5	NO		124
			29	69	old	female	Indian	6	primary		Yes	No	No	No	Yes		No	No	No	No		0	no_complication		1	1	1	1	1	1	1	1	1	1	1	1	1	1	1	1	1	1	NO		6	NO		79
			30	59	young	female	Malay	2	primary		No	No	No	No	Yes		No	No	No	No		0	no_complication		1	1	1	1	1	1	1	1	1	1	1	1	1	1	1	1	1	1	NO		3	NO		101
			31	66	old	female	Indian	2	primary		Yes	No	No	No	Yes		No	No	No	No		0	no_complication		2	3	3	1	1	2	2	1	1	1	2	1	2	1	1	2	2	1.65	NO		7	NO		7
			32	57	young	male	Malay	19	secondary		Yes	Yes	No	No	Yes		No	No	No	No		0	no_complication		1	5	5	4	3	2	5	4	1	4	3	2	2	3	4	1	2	3	DISTRESS		1	NO		99
			33	52	young	male	Malay	2	tertiary		No	No	No	No	Yes		No	No	No	No		0	no_complication		1	1	1	1	1	1	1	1	1	1	1	1	1	1	1	1	1	1	NO		3	NO		61
			34	59	young	female	Malay	2	tertiary		Yes	Yes	No	No	Yes		No	No	No	No		0	no_complication		2	2	2	2	2	2	2	2	2	2	2	2	2	2	2	2	2	2	NO		3	NO		124
			35	43	young	male	Malay	3	tertiary		Yes	Yes	No	No	Yes		No	No	No	No		0	no_complication		1	1	1	1	1	1	1	1	1	1	1	1	1	1	1	1	1	1	NO		1	NO		129
			36	43	young	male	Malay	3	secondary		Yes	Yes	No	No	Yes		No	No	No	No		0	no_complication		6	5	5	1	1	1	1	1	1	3	3	1	4	1	1	1	1	2.18	NO		6	NO		95
			37	59	young	male	Malay	5	primary		Yes	Yes	No	No	Yes		No	No	No	No		0	no_complication		1	1	1	1	1	1	1	1	1	1	1	1	1	1	1	1	1	1	NO		5	NO		56
			38	57	young	male	Malay	2	secondary		Yes	Yes	No	No	Yes		No	No	No	No		0	no_complication		3	3	2	2	2	1	2	1	2	3	2	2	2	2	2	2	2	2.06	NO		5	NO		119
			39	64	old	male	Malay	2	primary		Yes	No	No	No	Yes		No	No	No	No		0	no_complication		2	3	1	3	2	2	2	2	2	2	1	2	3	1	1	3	1	1.94	NO		9	NO		57
			40	43	young	female	Malay	2	secondary		Yes	Yes	No	No	Yes		No	No	No	No		0	no_complication		2	2	3	3	3	1	2	1	1	2	3	3	2	1	2	3	3	2.18	NO		4	NO		140
			41	45	young	male	Malay	2	secondary		Yes	Yes	No	No	Yes		No	No	No	No		0	no_complication		2	2	4	3	4	1	3	2	3	4	3	2	4	3	3	4	3	2.94	NO		4	NO		85
			42	52	young	male	Malay	2	primary		No	No	No	No	Yes		No	No	No	No		1	yes_complication		2	2	2	3	2	2	3	4	2	3	2	3	3	3	2	3	3	2.59	NO		6	NO		84
			43	48	young	male	Malay	2	tertiary		Yes	No	No	No	Yes		No	No	No	No		0	no_complication		2	2	1	4	3	3	3	3	3	2	2	4	4	5	3	5	4	3.12	DISTRESS		11	DEPRESSION		71
			44	66	old	female	Malay	9	primary		Yes	Yes	No	No	Yes		No	No	No	No		0	no_complication		2	2	2	2	3	2	2	3	2	2	2	3	2	2	2	1	2	2.12	NO		11	DEPRESSION		72
			45	48	young	male	Malay	4	secondary		Yes	No	No	No	Yes		No	No	No	No		0	no_complication		2	1	1	1	1	1	1	1	1	1	1	1	2	1	1	1	1	1.12	NO		0	NO		140
			46	61	old	female	Indian	2	primary		Yes	Yes	No	No	Yes		No	No	No	No		0	no_complication		1	1	1	1	1	1	1	1	1	1	1	1	1	1	1	1	1	1	NO		4	NO		125
			47	52	young	male	Malay	11	tertiary		Yes	Yes	No	No	Yes		No	No	No	No		0	no_complication		4	2	3	2	2	1	1	2	1	3	2	2	4	2	3	3	3	2.35	NO		4	NO		100
			48	51	young	female	Malay	5	primary		Yes	No	No	No	Yes		No	No	No	No		0	no_complication		3	2	3	4	3	3	2	3	3	1	3	4	3	3	4	3	3	2.94	NO		13	DEPRESSION		14
			49	55	young	female	Malay	2	primary		Yes	Yes	No	No	Yes		No	No	No	No		0	no_complication		5	5	1	5	5	1	5	1	1	5	5	1	5	5	2	2	1	3.24	DISTRESS		3	NO		121
			50	50	young	male	Malay	6	secondary		Yes	Yes	No	No	Yes		Yes	No	No	No		1	yes_complication		1	1	3	3	1	3	3	1	1	3	3	3	3	1	3	3	1	2.18	NO		0	NO		69
			51	63	old	female	Malay	6	primary		No	No	No	No	Yes		No	No	Yes	No		1	yes_complication		2	1	1	2	2	2	1	2	2	2	2	2	1	1	2	1	1	1.59	NO		2	NO		94
			52	59	young	female	Indian	3	primary		Yes	Yes	No	No	Yes		No	No	No	No		0	no_complication		2	2	1	1	1	1	1	1	1	1	1	1	1	1	1	1	1	1.12	NO		3	NO		112
			53	59	young	male	Indian	2	primary		No	Yes	No	No	Yes		No	No	No	No		0	no_complication		2	2	2	2	1	1	1	1	1	1	1	2	1	1	1	1	1	1.29	NO		8	NO		111
			54	63	old	female	Indian	24	primary		No	No	No	No	Yes		No	No	No	No		0	no_complication		2	2	1	1	1	2	2	1	1	2	1	1	1	1	1	1	1	1.29	NO		8	NO		98
			55	38	young	female	Malay	4	primary		Yes	No	No	No	Yes		No	No	No	No		0	no_complication		1	1	2	2	1	4	4	5	1	1	1	1	2	2	1	1	1	1.82	NO		0	NO		88
			56	57	young	female	Malay	19	primary		Yes	Yes	No	No	Yes		Yes	No	No	No		1	yes_complication		1	1	1	1	1	1	1	1	1	1	1	1	1	1	1	1	1	1	NO		3	NO		107
			57	38	young	female	Malay	2	primary		Yes	No	No	No	Yes		No	No	No	No		0	no_complication		2	2	2	2	2	2	2	2	2	2	2	2	2	2	2	2	2	2	NO		6	NO		99
			58	70	old	female	Malay	10	primary		Yes	Yes	No	No	Yes		No	No	No	No		0	no_complication		1	2	1	1	1	1	1	1	1	1	1	1	1	1	1	1	1	1.06	NO		7	NO		101
			59	67	old	female	Malay	6	primary		Yes	Yes	No	No	Yes		No	No	No	No		0	no_complication		2	2	2	5	3	5	3	3	3	3	2	2	3	2	1	5	3	2.88	NO		3	NO		36
			60	47	young	male	Malay	12	secondary		Yes	Yes	No	No	Yes		No	No	No	No		0	no_complication		2	1	1	1	1	1	1	1	1	1	1	1	1	1	1	1	1	1.06	NO		2	NO		140
			61	49	young	female	Malay	12	tertiary		Yes	Yes	No	No	Yes		No	No	No	No		0	no_complication		2	1	1	1	1	1	1	1	1	1	1	1	1	1	1	1	1	1.06	NO		3	NO		140
			62	70	old	male	Malay	2	primary		Yes	Yes	No	No	Yes		No	No	No	No		0	no_complication		2	2	1	1	1	1	1	1	1	1	1	1	1	1	1	1	1	1.12	NO		3	NO		117
			63	46	young	male	Malay	8	secondary		Yes	Yes	No	No	Yes		No	No	No	No		0	no_complication		1	1	1	1	1	1	1	1	1	1	1	1	2	1	1	1	1	1.06	NO		3	NO		140
			64	50	young	female	Malay	2	primary		Yes	Yes	No	No	Yes		No	No	No	No		0	no_complication		2	1	1	2	2	1	1	2	1	1	1	2	2	1	2	1	2	1.47	NO		5	NO		86
			65	44	young	female	Malay	5	secondary		Yes	Yes	No	No	Yes		No	No	No	No		0	no_complication		2	2	1	2	1	1	1	1	1	1	1	2	1	1	1	1	1	1.24	NO		5	NO		99
			66	43	young	female	Malay	2	secondary		No	No	No	No	Yes		No	No	No	No		0	no_complication		2	1	1	1	1	1	1	1	1	1	1	1	1	1	1	1	1	1.06	NO		3	NO		107
			67	72	old	male	Malay	2	primary		Yes	No	No	No	Yes		No	No	No	No		0	no_complication		1	1	1	1	1	1	1	1	1	1	1	1	1	1	1	1	1	1	NO		3	NO		89
			68	61	old	male	Malay	3	primary		Yes	Yes	No	No	Yes		No	No	No	No		0	no_complication		1	1	1	1	1	1	1	1	1	1	1	1	1	1	1	1	1	1	NO		4	NO		64
			69	46	young	female	Malay	2	secondary		Yes	Yes	No	No	Yes		Yes	No	No	No		1	yes_complication		2	2	1	1	1	1	1	1	1	1	1	1	1	1	1	1	1	1.12	NO		7	NO		119
			70	46	young	female	Malay	5	tertiary		No	No	No	No	Yes		Yes	No	No	No		1	yes_complication		2	2	1	1	1	1	1	1	1	1	1	1	1	1	1	1	1	1.12	NO		3	NO		125
			71	52	young	male	Malay	3	secondary		Yes	No	No	No	Yes		No	No	No	No		0	no_complication		2	2	2	1	1	2	2	1	1	2	2	1	1	1	2	1	1	1.47	NO		3	NO		105
			72	54	young	female	Chinese	8	primary		Yes	Yes	No	No	Yes		No	No	No	No		0	no_complication		1	1	1	1	1	1	1	1	1	1	1	1	1	1	1	1	1	1	NO		5	NO		82
			73	30	young	male	Malay	2	secondary		No	No	No	No	Yes		No	No	No	No		0	no_complication		3	4	3	3	4	3	3	2	3	3	3	3	3	3	2	3	2	2.94	NO		11	DEPRESSION		81
			74	55	young	female	Indian	2	primary		Yes	Yes	No	No	Yes		Yes	No	No	No		1	yes_complication		1	1	1	1	1	1	1	1	1	1	1	1	1	1	1	1	1	1	NO		3	NO		93
			75	56	young	female	Malay	2	primary		Yes	Yes	No	No	Yes		No	No	No	No		0	no_complication		1	1	1	1	1	1	1	1	1	1	1	1	1	1	1	1	1	1	NO		8	NO		126
			76	43	young	male	Indian	2	secondary		Yes	Yes	No	No	Yes		No	No	No	No		0	no_complication		2	2	2	2	2	2	2	2	2	2	2	2	2	2	2	2	2	2	NO		9	NO		106
			77	57	young	female	Malay	2	secondary		Yes	Yes	No	No	Yes		No	No	No	No		0	no_complication		1	1	1	1	1	1	1	1	1	1	1	1	1	1	1	1	1	1	NO		2	NO		105
			78	45	young	female	Indian	2	primary		Yes	Yes	No	No	Yes		No	No	No	No		0	no_complication		3	3	1	2	1	2	1	2	1	1	1	2	2	1	1	2	1	1.59	NO		8	NO		108
			79	51	young	female	Indian	10	primary		Yes	Yes	No	No	Yes		No	No	No	No		0	no_complication		2	2	2	1	2	2	1	1	1	2	2	1	2	1	2	2	1	1.59	NO		5	NO		94
			80	47	young	female	Malay	3	secondary		No	No	No	No	Yes		No	No	No	No		0	no_complication		2	2	2	2	2	1	1	1	1	1	2	2	2	2	1	2	2	1.65	NO		6	NO		14
			81	48	young	female	Malay	8	secondary		Yes	No	No	No	Yes		No	No	No	No		0	no_complication		2	2	1	2	1	1	1	1	1	1	1	2	1	1	1	1	1	1.24	NO		4	NO		119
			82	35	young	male	Malay	2	secondary		No	No	No	No	Yes		No	No	No	No		0	no_complication		1	1	4	4	1	3	1	1	4	1	2	1	4	1	2	1	1	1.94	NO		9	NO		84
			83	48	young	male	Indian	2	primary		Yes	Yes	No	No	Yes		No	No	No	No		0	no_complication		2	2	1	1	1	2	1	1	1	1	2	1	1	1	1	1	1	1.24	NO		5	NO		93
			84	61	old	female	Malay	9	primary		No	Yes	No	No	Yes		No	No	No	No		0	no_complication		1	3	2	2	2	1	1	1	1	3	2	1	2	1	1	1	1	1.53	NO		7	NO		96
			85	43	young	female	Chinese	2	tertiary		No	No	No	No	Yes		No	No	No	No		0	no_complication		2	3	4	3	3	3	2	2	5	4	4	3	3	3	5	4	5	3.41	DISTRESS		6	NO		69
			86	56	young	female	Malay	2	secondary		Yes	Yes	No	No	Yes		No	No	No	No		0	no_complication		1	1	1	1	1	1	1	1	1	1	1	1	1	1	1	1	1	1	NO		11	DEPRESSION		114
			87	52	young	male	Malay	10	secondary		Yes	No	No	No	Yes		No	No	No	No		0	no_complication		2	2	1	1	1	1	1	1	1	2	1	1	1	1	1	1	1	1.18	NO		5	NO		119
			88	37	young	female	Malay	18	secondary		Yes	No	No	No	Yes		Yes	No	No	No		1	yes_complication		2	4	2	2	2	5	5	3	2	3	1	2	1	1	1	1	1	2.24	NO		13	DEPRESSION		15
			89	55	young	male	Malay	6	secondary		No	No	No	No	Yes		No	No	No	No		0	no_complication		2	1	1	1	2	2	1	2	1	1	1	1	1	1	1	2	1	1.29	NO		7	NO		107
			90	41	young	male	Malay	8	primary		No	No	No	No	Yes		No	No	No	No		0	no_complication		2	1	1	1	1	2	1	2	1	1	1	2	1	1	1	1	1	1.24	NO		5	NO		114
			91	58	young	female	Malay	2	secondary		Yes	No	Yes	No	Yes		No	No	No	No		0	no_complication		2	1	1	1	1	1	1	1	1	1	1	1	1	1	1	1	1	1.06	NO		6	NO		110
			92	68	old	female	Chinese	10	secondary		Yes	No	No	Yes	Yes		No	No	No	No		0	no_complication		3	2	1	2	1	3	2	3	1	2	1	2	1	1	1	1	1	1.65	NO		6	NO		105
			93	54	young	male	Indian	9	secondary		Yes	Yes	No	No	Yes		No	Yes	No	No		1	yes_complication		1	1	1	1	1	1	1	1	1	1	1	1	1	1	1	1	1	1	NO		7	NO		92
			94	63	old	female	Indian	2	primary		Yes	Yes	No	No	Yes		Yes	No	No	No		1	yes_complication		1	1	1	1	1	1	2	2	1	2	2	2	1	1	1	2	1	1.35	NO		3	NO		91
			95	47	young	male	Malay	4	secondary		Yes	Yes	No	No	Yes		Yes	No	No	No		1	yes_complication		3	3	3	5	2	2	3	3	3	3	4	3	5	3	3	3	2	3.12	DISTRESS		4	NO		85
			96	59	young	female	Malay	11	primary		Yes	Yes	No	No	Yes		Yes	No	No	No		1	yes_complication		1	1	1	1	1	1	1	1	1	1	1	1	1	1	1	1	1	1	NO		5	NO		95
			97	63	old	female	Chinese	6	primary		Yes	No	No	No	Yes		No	Yes	No	No		1	yes_complication		1	1	1	1	1	1	1	1	1	1	1	1	1	1	1	1	1	1	NO		5	NO		91
			98	66	old	female	Malay	2	secondary		No	No	No	No	Yes		No	No	No	No		0	no_complication		1	1	1	1	1	1	1	1	1	1	1	1	1	1	1	1	1	1	NO		0	NO		90
			99	51	young	female	Malay	16	secondary		No	No	No	No	Yes		Yes	No	No	No		1	yes_complication		2	2	2	2	1	2	1	1	2	2	2	1	1	2	1	1	2	1.59	NO		1	NO		101
			100	41	young	female	Indian	7	secondary		Yes	No	No	No	Yes		Yes	No	No	No		1	yes_complication		1	2	2	1	1	1	2	1	2	1	1	1	1	2	1	1	1	1.29	NO		5	NO		97
			101	37	young	female	Chinese	2	tertiary		Yes	No	No	No	Yes		No	No	No	No		0	no_complication		4	5	5	4	4	1	2	1	1	1	5	4	6	3	2	1	1	2.94	NO		8	NO		52
			102	48	young	female	Malay	2	secondary		Yes	Yes	No	No	Yes		No	No	No	No		0	no_complication		2	2	1	1	1	1	1	1	1	1	2	1	3	1	1	1	1	1.29	NO		2	NO		95
			103	47	young	male	Malay	2	primary		Yes	No	No	No	Yes		No	No	No	No		0	no_complication		1	1	1	2	1	1	1	1	2	2	1	1	1	1	1	2	1	1.24	NO		3	NO		78
			104	51	young	male	Malay	3	primary		Yes	Yes	Yes	No	No		No	No	No	No		0	no_complication		1	1	4	1	1	1	1	1	1	3	3	1	3	1	2	1	3	1.71	NO		3	NO		131
			105	57	young	female	Indian	7	primary		Yes	Yes	No	No	No		No	No	No	No		0	no_complication		2	2	2	1	1	1	1	1	1	2	2	1	1	1	2	1	1	1.35	NO		5	NO		114
			106	49	young	female	Malay	4	tertiary		Yes	No	No	No	No		No	No	No	No		0	no_complication		1	1	1	1	1	1	1	1	1	1	1	1	1	1	1	1	1	1	NO		2	NO		106
			107	56	young	male	Malay	2	tertiary		Yes	Yes	Yes	No	No		No	No	No	No		0	no_complication		2	2	2	2	2	1	1	2	3	2	2	2	3	2	2	4	2	2.12	NO		6	NO		90
			108	56	young	female	Indian	5	primary		Yes	Yes	No	No	No		No	No	No	No		0	no_complication		1	1	1	1	1	1	1	1	1	1	1	1	1	1	1	1	1	1	NO		3	NO		110
			109	52	young	male	Malay	9	tertiary		Yes	Yes	No	No	No		No	No	No	No		0	no_complication		2	2	2	1	2	3	3	2	3	1	3	1	2	1	1	3	2	2	NO		6	NO		90
			110	76	old	female	Malay	4	primary		Yes	Yes	No	No	No		No	No	No	No		1	yes_complication		3	2	1	1	1	1	1	1	1	1	1	1	1	1	6	1	1	1.47	NO		3	NO		130
			111	57	young	male	Malay	4	tertiary		Yes	Yes	Yes	No	No		No	No	No	No		0	no_complication		2	1	2	1	1	1	1	1	1	2	2	2	3	2	1	1	1	1.47	NO		4	NO		120
			112	43	young	female	Malay	5	primary		Yes	Yes	No	No	No		No	No	No	No		0	no_complication		2	2	1	1	1	1	1	2	1	1	1	1	1	1	1	1	1	1.18	NO		5	NO		101
			113	66	old	male	Malay	3	primary		Yes	Yes	No	No	No		No	No	No	No		0	no_complication		1	1	1	1	1	1	1	1	1	1	1	1	1	1	1	1	1	1	NO		6	NO		116
			114	67	old	female	Malay	9	primary		Yes	Yes	No	No	No		No	No	No	No		0	no_complication		1	1	1	1	1	1	1	1	1	1	1	1	1	1	1	1	1	1	NO		1	NO		109
			115	67	old	female	Malay	5	primary		Yes	Yes	No	No	No		No	No	No	No		0	no_complication		2	1	1	1	1	1	1	1	1	1	1	1	1	1	1	1	1	1.06	NO		2	NO		122
			116	64	old	female	Malay	7	primary		Yes	Yes	No	No	No		No	Yes	No	No		1	yes_complication		2	1	1	1	1	1	1	1	1	1	1	1	1	1	1	1	1	1.06	NO		1	NO		95
			117	52	young	female	Malay	2	secondary		Yes	Yes	No	No	No		No	No	No	No		0	no_complication		4	1	1	1	1	1	1	1	1	1	1	1	1	1	1	1	1	1.18	NO		1	NO		92
			118	52	young	female	Malay	5	primary		Yes	Yes	No	No	No		No	No	No	No		0	no_complication		2	2	2	2	2	2	2	2	2	2	2	2	2	2	2	2	2	2	NO		1	NO		88
			119	65	old	male	Malay	10	secondary		Yes	Yes	No	No	No		No	No	No	No		0	no_complication		2	2	1	1	1	1	1	1	1	1	1	1	1	1	1	1	1	1.12	NO		3	NO		112
			120	66	old	male	Malay	5	primary		Yes	Yes	No	No	No		No	No	No	No		0	no_complication		2	3	2	2	1	1	1	1	1	1	1	2	2	1	1	1	1	1.41	NO		3	NO		117
			121	61	old	female	Indian	7	primary		Yes	Yes	Yes	No	No		No	No	No	No		0	no_complication		1	2	1	1	2	1	1	1	2	1	1	1	2	2	1	2	1	1.35	NO		1	NO		70
			122	55	young	female	Malay	4	primary		Yes	Yes	No	No	No		No	No	No	No		0	no_complication		1	1	1	1	1	1	1	1	1	1	1	2	1	1	1	2	1	1.12	NO		3	NO		101
			123	70	old	female	Malay	13	primary		Yes	Yes	No	No	No		No	No	No	No		0	no_complication		3	3	1	1	1	2	1	1	1	1	1	1	1	1	1	1	1	1.29	NO		3	NO		114
			124	69	old	female	Malay	5	primary		No	Yes	Yes	No	No		No	No	No	No		0	no_complication		1	1	1	1	1	1	1	1	1	1	1	1	1	1	1	1	1	1	NO		0	NO		87
			125	52	young	female	Malay	3	primary		Yes	Yes	No	No	No		No	No	No	No		0	no_complication		3	3	2	2	2	3	1	1	2	2	2	2	2	2	2	2	2	2.06	NO		5	NO		97
			126	47	young	female	Malay	2	secondary		Yes	Yes	No	No	No		No	No	No	No		0	no_complication		2	2	1	1	1	1	1	1	2	1	1	1	1	2	1	1	2	1.29	NO		3	NO		114
			127	53	young	female	Malay	4	secondary		Yes	Yes	No	No	No		No	No	No	No		0	no_complication		3	2	1	1	1	2	2	1	1	2	1	1	1	1	1	1	1	1.35	NO		3	NO		99
			128	40	young	female	Malay	2	secondary		Yes	Yes	No	No	No		No	No	No	No		0	no_complication		3	3	3	3	4	3	3	3	4	3	3	3	3	3	3	3	3	3.12	DISTRESS		1	NO		98
			129	59	young	female	Indian	10	tertiary		Yes	Yes	No	No	No		No	No	No	No		0	no_complication		2	1	2	2	1	2	1	3	1	1	2	3	2	3	2	2	3	1.94	NO		3	NO		79
			130	52	young	female	Indian	9	primary		Yes	No	No	No	No		No	No	No	No		0	no_complication		2	2	1	1	1	2	2	2	1	1	1	2	1	1	1	1	2	1.41	NO		1	NO		91
			131	59	young	female	Indian	8	primary		Yes	Yes	No	No	No		No	No	No	No		0	no_complication		2	2	1	2	1	2	1	2	1	1	2	2	2	1	2	1	2	1.59	NO		3	NO		107
			132	58	young	male	Indian	7	primary		Yes	Yes	No	No	No		No	No	No	No		1	yes_complication		4	4	2	2	3	4	3	2	3	3	3	2	2	2	2	3	2	2.71	NO		0	NO		82
			133	44	young	female	Malay	5	primary		Yes	Yes	No	No	No		No	No	No	No		0	no_complication		2	2	1	2	2	2	1	2	2	1	2	2	1	3	2	1	2	1.76	NO		1	NO		81
			134	59	young	male	Chinese	6	primary		Yes	Yes	No	No	No		No	No	No	No		0	no_complication		3	3	1	3	2	3	2	3	1	2	3	3	2	1	2	2	1	2.18	NO		0	NO		126
			135	76	old	male	Malay	23	primary		Yes	Yes	Yes	No	No		No	No	No	No		0	no_complication		3	3	4	2	3	3	4	3	2	4	3	3	2	2	3	3	1	2.82	NO		2	NO		87
			136	64	old	male	Chinese	14	primary		Yes	No	No	No	No		No	No	No	No		0	no_complication		2	2	2	2	1	1	1	1	1	1	1	2	2	1	1	1	1	1.35	NO		6	NO		105
			137	52	young	female	Malay	7	secondary		Yes	No	No	No	No		No	No	No	No		0	no_complication		2	3	1	3	3	1	1	1	1	1	1	3	3	1	1	1	1	1.65	NO		5	NO		105
			138	52	young	female	Malay	2	secondary		Yes	Yes	No	No	No		No	No	No	No		0	no_complication		2	3	1	1	1	1	1	1	1	1	1	1	1	1	1	1	1	1.18	NO		4	NO		100
			139	58	young	female	Indian	2	primary		Yes	Yes	No	No	No		No	No	No	No		0	no_complication		4	1	1	3	2	2	1	2	1	1	1	3	3	1	1	2	1	1.76	NO		6	NO		115
			140	38	young	male	Malay	6	tertiary		Yes	Yes	No	No	No		No	No	No	No		0	no_complication		3	1	1	1	1	1	1	1	1	1	1	1	1	1	1	1	1	1.12	NO		3	NO		114
			141	41	young	male	Indian	2	primary		Yes	No	No	No	No		No	No	No	No		0	no_complication		1	1	1	1	1	1	1	1	1	1	1	1	1	1	1	1	1	1	NO		5	NO		109
			142	55	young	female	Malay	9	secondary		Yes	Yes	No	No	No		No	Yes	No	No		1	yes_complication		2	1	1	1	1	2	1	1	1	1	1	1	1	1	1	1	1	1.12	NO		4	NO		112
			143	50	young	female	Indian	4	secondary		Yes	Yes	No	No	No		No	No	No	No		0	no_complication		1	1	1	1	1	1	1	1	1	1	1	1	1	1	1	1	1	1	NO		5	NO		127
			144	51	young	female	Malay	4	secondary		Yes	Yes	No	No	No		No	No	No	No		0	no_complication		1	1	1	1	1	1	1	1	1	1	1	1	1	1	3	2	2	1.24	NO		5	NO		136
			145	48	young	male	Malay	6	primary		Yes	Yes	No	No	No		No	No	No	No		0	no_complication		2	2	2	1	1	1	1	1	1	2	2	1	1	1	2	1	1	1.35	NO		6	NO		127
			146	47	young	female	Malay	8	tertiary		Yes	No	No	No	No		No	No	No	No		0	no_complication		1	2	1	1	1	1	1	1	1	1	1	1	1	1	1	1	1	1.06	NO		3	NO		126
			147	56	young	female	Malay	4	primary		Yes	No	No	No	No		No	No	No	No		0	no_complication		1	1	1	1	1	1	1	1	1	1	1	1	1	1	1	1	1	1	NO		3	NO		129
			148	58	young	female	Malay	3	primary		Yes	No	No	No	No		No	No	No	No		0	no_complication		2	1	2	1	1	1	1	1	1	2	2	1	1	1	1	1	1	1.24	NO		5	NO		118
			149	54	young	female	Indian	3	primary		Yes	Yes	No	No	No		No	No	No	No		0	no_complication		1	1	1	1	1	1	1	1	1	1	1	1	1	1	1	1	1	1	NO		3	NO		120
			150	40	young	female	Indian	3	secondary		Yes	Yes	No	No	No		No	No	No	No		0	no_complication		1	1	2	2	1	1	1	1	1	1	2	2	2	1	2	1	1	1.35	NO		6	NO		122
			151	56	young	male	Malay	9	secondary		Yes	No	No	No	No		No	Yes	No	No		1	yes_complication		1	1	1	1	1	2	1	1	1	1	1	2	2	1	1	1	1	1.18	NO		3	NO		120
			152	63	old	male	Malay	4	secondary		Yes	Yes	No	No	No		Yes	No	No	No		1	yes_complication		1	1	1	1	1	1	1	1	1	1	1	1	1	1	1	1	1	1	NO		4	NO		60
			153	53	young	male	Malay	2	tertiary		Yes	Yes	No	No	No		No	No	No	No		0	no_complication		2	2	1	2	4	2	2	3	4	1	2	1	4	4	1	4	3	2.47	NO		3	NO		101
			154	48	young	female	Malay	13	secondary		Yes	Yes	No	No	No		No	No	No	No		0	no_complication		2	1	1	1	2	2	1	2	2	2	2	2	1	1	2	1	1	1.53	NO		3	NO		121
			155	35	young	male	Malay	2	secondary		Yes	Yes	No	No	No		No	No	No	No		0	no_complication		3	2	1	2	1	3	2	2	2	2	2	2	1	2	1	1	1	1.76	NO		3	NO		103
			156	44	young	female	Chinese	4	secondary		Yes	No	No	No	No		No	No	No	No		0	no_complication		1	1	1	1	1	1	1	1	1	1	1	1	1	1	1	1	1	1	NO		3	NO		104
			157	56	young	male	Malay	8	secondary		Yes	Yes	No	No	No		No	No	No	No		0	no_complication		1	1	1	1	1	1	1	1	1	1	1	1	1	1	1	1	1	1	NO		1	NO		97
			158	27	young	male	Malay	2	secondary		Yes	No	No	No	No		No	No	No	No		0	no_complication		1	1	1	1	1	1	1	1	1	1	1	1	1	1	1	1	1	1	NO		3	NO		86
			159	63	old	male	Malay	9	secondary		Yes	Yes	No	No	No		Yes	No	No	No		1	yes_complication		1	1	1	1	1	1	1	1	1	1	1	1	1	1	1	1	1	1	NO		3	NO		116
			160	46	young	female	Malay	2	primary		Yes	No	No	No	No		No	No	No	No		0	no_complication		1	2	2	1	2	1	2	1	1	1	1	1	1	1	2	2	1	1.35	NO		3	NO		126
			161	53	young	female	Indian	4	primary		Yes	Yes	No	No	No		No	No	No	No		0	no_complication		1	1	1	1	1	1	1	1	1	1	1	1	1	1	1	1	1	1	NO		7	NO		114
			162	59	young	female	Malay	4	secondary		Yes	Yes	Yes	No	No		No	No	No	No		0	no_complication		1	1	1	1	1	1	1	1	1	1	1	1	1	1	1	1	1	1	NO		3	NO		134
			163	52	young	female	Malay	16	secondary		Yes	No	No	No	No		No	No	No	No		0	no_complication		1	1	1	1	2	1	1	2	1	2	2	2	1	1	1	1	1	1.29	NO		3	NO		117
			164	60	old	male	Malay	7	secondary		Yes	No	No	No	No		No	No	No	No		0	no_complication		1	1	1	1	1	1	1	1	1	1	1	1	1	1	1	1	1	1	NO		3	NO		120
			165	38	young	male	Malay	11	secondary		Yes	Yes	Yes	No	No		No	No	No	No		0	no_complication		1	2	1	1	1	1	2	1	1	2	2	1	2	1	1	2	1	1.35	NO		4	NO		117
			166	72	old	male	Indian	5	primary		Yes	No	No	No	No		Yes	No	No	No		1	yes_complication		2	1	2	1	1	1	1	1	1	2	2	1	1	1	2	1	1	1.29	NO		3	NO		118
			167	50	young	female	Malay	2	secondary		Yes	Yes	No	No	No		No	No	No	No		0	no_complication		1	1	1	1	1	1	1	1	1	1	1	1	1	1	1	1	1	1	NO		4	NO		117
			168	71	old	male	Malay	4	secondary		Yes	Yes	No	No	No		No	Yes	No	No		1	yes_complication		3	3	1	1	1	1	1	1	1	2	1	1	1	1	1	1	1	1.29	NO		4	NO		121
			169	55	young	female	Malay	8	primary		Yes	Yes	No	No	No		No	No	No	No		0	no_complication		1	1	1	1	1	1	1	1	1	1	1	1	1	1	1	1	1	1	NO		2	NO		91
			170	66	old	male	Malay	2	secondary		Yes	Yes	No	No	No		No	No	No	No		0	no_complication		1	1	1	1	1	1	1	1	1	1	1	1	1	1	1	1	1	1	NO		5	NO		85
			171	50	young	female	Indian	4	secondary		Yes	Yes	No	No	No		No	No	No	No		0	no_complication		2	2	1	2	2	2	1	2	2	2	2	2	2	1	1	2	1	1.71	NO		1	NO		75
			172	48	young	female	Malay	13	secondary		Yes	No	No	No	No		No	No	No	No		0	no_complication		5	5	2	1	2	5	5	2	2	2	2	2	1	1	2	2	1	2.47	NO		6	NO		105
			173	55	young	female	Malay	5	primary		Yes	Yes	Yes	No	No		Yes	No	No	No		1	yes_complication		1	1	1	1	1	1	1	1	1	1	1	1	1	1	1	1	1	1	NO		5	NO		122
			174	66	old	male	Indian	5	secondary		Yes	Yes	No	No	No		No	No	No	No		0	no_complication		1	1	1	1	1	1	1	1	1	1	1	1	1	1	1	1	1	1	NO		1	NO		120
			175	71	old	female	Malay	7	secondary		Yes	No	No	No	No		No	No	No	No		0	no_complication		3	3	1	2	1	1	1	1	1	2	2	3	2	1	1	1	1	1.59	NO		5	NO		127
			176	46	young	female	Chinese	12	secondary		Yes	No	No	No	No		No	No	No	No		0	no_complication		1	1	1	1	1	1	1	1	1	1	1	1	1	1	1	1	1	1	NO		4	NO		124
			177	46	young	female	Malay	4	secondary		Yes	Yes	Yes	No	No		No	No	No	No		0	no_complication		1	1	1	1	1	1	1	1	1	1	1	1	1	1	1	1	1	1	NO		3	NO		122
			178	63	old	female	Indian	8	primary		Yes	Yes	No	No	No		No	No	No	No		0	no_complication		1	1	1	1	2	1	1	1	1	1	1	1	1	1	1	2	1	1.12	NO		6	NO		120
			179	56	young	male	Indian	7	secondary		Yes	No	No	No	No		Yes	No	No	No		1	yes_complication		1	1	1	1	1	1	1	1	1	1	1	1	1	1	1	1	1	1	NO		5	NO		109
			180	41	young	female	Indian	7	primary		Yes	Yes	No	No	No		No	No	No	No		0	no_complication		1	1	1	1	1	1	1	1	1	1	1	1	1	1	1	1	1	1	NO		5	NO		127
			181	58	young	male	Indian	11	secondary		Yes	Yes	No	No	No		No	No	No	No		0	no_complication		1	1	1	1	1	1	1	1	1	1	1	1	1	1	1	1	1	1	NO		6	NO		126
			182	59	young	female	Malay	7	primary		Yes	Yes	No	No	No		No	No	No	No		0	no_complication		1	1	1	1	1	1	1	1	1	1	1	1	1	1	1	1	1	1	NO		2	NO		95
			183	47	young	female	Malay	9	primary		Yes	Yes	No	No	No		No	No	No	No		0	no_complication		1	1	1	1	1	1	1	1	1	1	1	1	1	1	1	1	1	1	NO		3	NO		80
			184	64	old	male	Indian	7	primary		Yes	Yes	No	No	No		No	No	No	No		0	no_complication		1	1	1	1	1	1	1	2	1	1	1	2	1	1	1	1	2	1.18	NO		5	NO		64
			185	57	young	female	Malay	5	secondary		Yes	Yes	Yes	No	No		Yes	No	No	No		1	yes_complication		1	1	1	1	1	1	1	1	1	1	1	1	1	1	1	1	1	1	NO		7	NO		112
			186	64	old	male	Malay	11	tertiary		Yes	Yes	No	No	No		No	No	No	No		0	no_complication		2	2	2	2	1	2	2	2	2	1	1	2	2	2	1	1	1	1.65	NO		3	NO		118
			187	59	young	female	Malay	9	primary		Yes	Yes	No	No	No		No	No	No	No		0	no_complication		2	1	1	1	2	2	1	2	2	1	2	2	1	1	1	1	1	1.41	NO		5	NO		140
			188	43	young	male	Malay	2	secondary		No	Yes	No	No	No		No	No	No	No		0	no_complication		2	2	1	1	2	2	2	1	2	2	1	1	1	2	1	2	2	1.59	NO		4	NO		116
			189	54	young	female	Indian	3	secondary		Yes	Yes	No	No	No		Yes	No	No	No		1	yes_complication		1	1	1	1	1	1	1	1	1	1	1	1	1	1	1	1	1	1	NO		3	NO		112
			190	37	young	female	Malay	2	primary		No	Yes	No	No	No		No	No	No	No		0	no_complication		1	1	1	1	1	1	1	1	1	1	1	1	1	1	1	1	1	1	NO		4	NO		140
			191	48	young	female	Malay	2	secondary		Yes	No	No	No	No		No	No	No	No		0	no_complication		1	1	1	1	1	1	1	1	1	1	1	1	1	1	1	1	1	1	NO		4	NO		110
			192	53	young	male	Malay	7	tertiary		Yes	Yes	No	No	No		No	No	No	No		0	no_complication		2	2	1	1	1	1	1	1	1	1	1	1	2	1	1	2	1	1.24	NO		5	NO		109
			193	57	young	female	Malay	5	secondary		Yes	Yes	No	No	No		Yes	No	No	No		1	yes_complication		2	2	1	1	1	1	1	1	1	2	2	1	1	1	5	1	1	1.47	NO		4	NO		139
			194	46	young	female	Malay	2	secondary		Yes	Yes	No	No	No		No	No	No	No		0	no_complication		1	1	1	1	1	1	1	1	1	1	1	1	1	1	1	1	1	1	NO		6	NO		103
			195	56	young	male	Chinese	3	primary		Yes	Yes	No	No	No		No	No	No	No		0	no_complication		1	1	1	1	1	1	1	1	1	1	1	1	1	1	1	1	1	1	NO		4	NO		70
			196	57	young	male	Chinese	5	primary		Yes	Yes	No	No	No		No	No	No	No		0	no_complication		1	1	1	1	1	1	1	1	1	1	1	1	1	1	1	1	1	1	NO		1	NO		90
			197	49	young	female	Malay	2	primary		Yes	Yes	No	No	No		No	No	No	No		0	no_complication		3	3	1	1	1	1	1	1	1	2	2	1	1	1	1	1	1	1.35	NO		5	NO		101
			198	47	young	female	Indian	2	primary		Yes	No	No	No	No		No	No	No	No		0	no_complication		1	1	1	1	1	1	1	1	1	1	1	1	1	1	1	1	1	1	NO		3	NO		105
			199	46	young	female	Malay	5	secondary		Yes	Yes	No	No	No		Yes	No	No	No		1	yes_complication		2	1	1	1	1	1	1	1	1	1	1	1	1	1	1	1	1	1.06	NO		3	NO		91
			200	56	young	female	Malay	18	primary		Yes	Yes	No	No	No		Yes	Yes	Yes	Yes		6	yes_complication		1	1	1	1	1	1	1	1	1	1	1	1	1	1	1	1	1	1	NO		7	NO		77
			201	58	young	female	Indian	10	primary		Yes	No	No	No	No		No	No	No	No		0	no_complication		1	1	1	2	1	1	1	1	1	1	1	1	2	1	1	1	1	1.12	NO		7	NO		100
			202	72	old	male	Malay	15	primary		Yes	Yes	No	No	No		No	No	No	No		0	no_complication		1	1	1	1	1	1	1	1	1	1	1	1	1	1	1	1	1	1	NO		5	NO		93
			203	58	young	male	Indian	5	primary		Yes	Yes	No	No	No		No	No	No	No		0	no_complication		1	1	1	1	1	1	1	1	1	1	1	1	1	1	1	1	1	1	NO		10	DEPRESSION		79
			204	49	young	female	Malay	13	secondary		Yes	Yes	No	No	No		No	No	No	No		0	no_complication		1	1	1	1	1	1	1	1	1	1	1	1	1	1	1	1	1	1	NO		6	NO		114
			205	63	old	female	Indian	19	primary		Yes	No	No	No	No		No	No	No	No		0	no_complication		1	1	1	1	1	1	1	1	1	1	1	1	1	1	1	1	1	1	NO		3	NO		98
			206	78	old	female	Chinese	14	primary		Yes	Yes	No	No	No		Yes	No	No	No		1	yes_complication		1	1	1	1	1	1	1	1	1	1	1	1	1	1	1	1	1	1	NO		4	NO		112
			207	43	young	male	Malay	2	secondary		Yes	Yes	No	No	No		No	No	No	No		0	no_complication		1	1	1	1	1	1	1	1	1	1	1	1	1	1	1	1	1	1	NO		3	NO		113
			208	60	old	male	Malay	3	secondary		Yes	Yes	No	No	No		No	No	No	No		0	no_complication		1	1	1	1	1	1	1	1	1	1	1	1	1	1	1	1	1	1	NO		4	NO		126
			209	41	young	female	Malay	7	secondary		Yes	Yes	No	No	No		No	No	No	No		0	no_complication		2	1	2	1	1	2	1	2	2	1	1	2	1	2	2	1	1	1.47	NO		3	NO		94
			210	54	young	female	Chinese	5	secondary		Yes	Yes	No	No	No		No	No	No	No		0	no_complication		2	3	2	2	3	1	1	1	1	2	2	2	2	2	1	1	1	1.71	NO		5	NO		101
			211	72	old	female	Indian	2	primary		Yes	Yes	No	No	No		No	No	No	No		0	no_complication		1	2	1	2	1	1	1	1	1	1	1	1	2	1	1	1	1	1.18	NO		4	NO		114
			212	62	old	male	Indian	2	primary		Yes	Yes	No	No	No		No	Yes	No	No		1	yes_complication		1	1	1	1	1	1	1	1	1	1	1	1	1	1	1	1	1	1	NO		3	NO		108
			213	79	old	female	Chinese	2	primary		Yes	Yes	No	No	No		No	No	No	No		0	no_complication		1	1	1	1	1	1	1	1	1	1	1	1	1	1	1	1	1	1	NO		4	NO		106
			214	62	old	male	Indian	4	secondary		Yes	Yes	No	No	No		No	Yes	No	No		1	yes_complication		1	1	1	1	1	1	1	2	1	1	1	1	1	1	1	1	1	1.06	NO		4	NO		116
			215	66	old	male	Indian	6	secondary		Yes	Yes	No	No	No		No	No	No	No		0	no_complication		2	1	1	2	1	2	1	1	1	1	1	1	2	1	1	2	1	1.29	NO		6	NO		107
			216	69	old	male	Indian	3	secondary		Yes	Yes	No	No	No		No	No	No	Yes		2	yes_complication		4	5	3	2	2	1	2	3	2	2	2	3	2	3	2	4	1	2.53	NO		5	NO		87
			217	62	old	male	Chinese	3	primary		Yes	No	No	No	No		No	No	No	No		0	no_complication		2	1	1	1	1	2	1	1	1	1	1	1	1	1	1	1	1	1.12	NO		3	NO		74
			218	60	old	female	Chinese	2	secondary		Yes	Yes	No	No	No		No	No	No	No		0	no_complication		1	2	1	1	1	2	1	1	1	1	1	1	1	1	2	1	1	1.18	NO		6	NO		99
			219	54	young	male	Chinese	20	primary		Yes	Yes	No	No	No		Yes	No	No	No		1	yes_complication		1	1	1	2	1	1	2	2	1	2	2	2	1	2	1	1	2	1.47	NO		3	NO		107
			220	65	old	male	Chinese	5	primary		Yes	Yes	No	No	No		No	No	No	No		0	no_complication		2	1	2	1	2	2	1	1	2	1	1	1	1	1	1	1	1	1.29	NO		2	NO		78
			221	62	old	female	Indian	5	secondary		Yes	Yes	No	No	No		No	No	No	No		0	no_complication		1	1	1	1	1	1	1	1	1	1	1	1	1	1	1	1	1	1	NO		3	NO		109
			222	60	old	male	Chinese	9	primary		Yes	Yes	No	No	No		No	No	No	No		0	no_complication		1	1	1	1	1	1	1	1	1	1	1	1	1	1	1	1	1	1	NO		7	NO		111
			223	58	young	female	Chinese	9	primary		Yes	No	No	No	No		No	No	No	No		0	no_complication		1	1	2	1	1	2	1	1	1	1	2	2	1	1	2	2	1	1.35	NO		6	NO		106
			224	44	young	female	Indian	5	primary		Yes	Yes	No	No	No		No	No	No	No		0	no_complication		1	1	1	1	1	1	1	1	1	1	1	1	2	1	1	1	1	1.06	NO		8	NO		105
			225	65	old	male	Chinese	10	primary		Yes	Yes	No	No	No		No	No	No	No		0	no_complication		2	1	1	1	1	2	1	2	1	1	2	2	1	2	2	1	1	1.41	NO		5	NO		87
			226	57	young	female	Indian	5	primary		Yes	Yes	No	No	No		No	No	No	No		0	no_complication		3	3	2	3	2	3	2	4	2	2	3	3	3	4	3	3	3	2.82	NO		5	NO		79
			227	58	young	female	Indian	13	primary		Yes	Yes	No	No	No		No	No	No	No		0	no_complication		2	2	1	1	2	2	1	2	2	1	1	2	1	1	1	1	1	1.41	NO		3	NO		119
			228	39	young	female	Indian	2	secondary		Yes	Yes	No	No	No		No	No	No	No		0	no_complication		1	2	1	2	1	1	1	2	2	1	2	2	1	2	1	1	1	1.41	NO		4	NO		117
			229	60	old	female	Indian	3	secondary		Yes	Yes	No	No	No		No	No	No	No		0	no_complication		2	2	1	22	2	1	1	1	1	2	2	2	1	1	1	1	1	2.59	NO		4	NO		106
			230	58	young	female	Indian	8	secondary		Yes	No	No	No	No		No	No	No	No		0	no_complication		1	1	1	2	2	1	1	2	2	2	2	2	1	1	2	1	1	1.47	NO		3	NO		79
			231	33	young	female	Indian	5	secondary		Yes	Yes	No	No	No		No	No	No	No		0	no_complication		1	1	1	1	1	1	1	1	1	1	1	1	1	1	1	1	1	1	NO		3	NO		106
			232	64	old	female	Malay	8	secondary		Yes	Yes	No	No	No		No	No	No	No		0	no_complication		1	1	1	1	1	1	1	1	1	1	1	1	1	1	1	1	1	1	NO		7	NO		126
			233	48	young	female	Indian	3	secondary		Yes	No	No	No	No		No	No	No	No		0	no_complication		1	2	1	2	1	2	1	1	1	1	1	1	2	1	1	1	1	1.24	NO		7	NO		118
			234	52	young	female	Chinese	10	secondary		Yes	Yes	No	No	No		No	No	No	No		0	no_complication		1	1	1	1	1	1	1	1	1	1	1	1	1	1	1	1	1	1	NO		3	NO		113
			235	58	young	female	Indian	2	primary		Yes	Yes	No	No	No		No	No	No	No		0	no_complication		1	1	1	1	1	1	1	1	1	1	1	1	1	1	1	1	1	1	NO		3	NO		112
			236	65	old	female	Chinese	13	primary		Yes	No	No	No	No		No	No	No	No		0	no_complication		1	2	1	1	2	1	1	1	2	2	2	1	2	1	1	1	1	1.35	NO		4	NO		119
			237	60	old	male	Indian	13	primary		Yes	No	No	No	No		No	No	No	No		0	no_complication		1	1	1	1	1	1	1	1	1	1	1	1	1	1	1	2	1	1.06	NO		5	NO		106
			238	43	young	female	Malay	2	secondary		Yes	Yes	No	No	No		No	No	No	No		0	no_complication		1	1	1	1	1	1	1	1	1	1	1	1	1	1	1	1	1	1	NO		3	NO		125
			239	58	young	female	Indian	2	primary		Yes	Yes	No	No	No		No	No	No	No		0	no_complication		1	1	2	1	1	1	2	1	1	1	1	1	1	1	2	1	1	1.18	NO		7	NO		102
			240	58	young	male	Indian	7	secondary		Yes	Yes	No	No	No		Yes	Yes	No	No		2	yes_complication		2	2	1	1	1	1	1	1	1	1	1	1	2	1	2	2	1	1.29	NO		3	NO		108
			241	51	young	female	Indian	2	primary		Yes	Yes	No	No	No		No	Yes	No	No		1	yes_complication		2	2	2	2	1	2	1	2	1	1	1	1	2	1	1	2	1	1.47	NO		6	NO		84
			242	60	old	female	Chinese	28	primary		Yes	Yes	No	No	No		No	No	No	No		0	no_complication		1	1	1	1	2	1	2	1	1	1	1	2	1	1	1	2	1	1.24	NO		4	NO		111
			243	76	old	male	Chinese	9	secondary		Yes	Yes	No	No	No		No	No	No	No		0	no_complication		3	2	2	2	3	1	2	1	1	4	3	2	3	2	2	3	2	2.24	NO		3	NO		97
			244	64	old	female	Indian	8	primary		Yes	Yes	No	No	No		No	No	No	No		0	no_complication		2	3	1	3	2	1	1	1	2	2	2	3	3	2	2	2	1	1.94	NO		6	NO		115
			245	55	young	female	Indian	6	secondary		Yes	Yes	No	No	No		No	No	No	No		0	no_complication		3	3	2	2	3	1	2	1	1	2	3	3	2	1	2	3	3	2.18	NO		5	NO		103
			246	44	young	male	Indian	11	primary		Yes	Yes	No	No	No		No	No	No	No		0	no_complication		1	1	2	1	2	1	2	2	1	2	1	2	1	1	1	2	2	1.47	NO		4	NO		98
			247	36	young	female	Chinese	3	secondary		Yes	Yes	No	No	No		No	No	No	No		0	no_complication		2	3	2	2	3	3	2	3	3	2	2	3	2	2	2	2	2	2.35	NO		6	NO		105
			248	47	young	female	Indian	6	primary		Yes	Yes	No	No	No		No	No	No	No		0	no_complication		1	1	1	1	1	1	1	1	1	1	1	1	1	1	1	1	1	1	NO		3	NO		113
			249	71	old	male	Chinese	9	secondary		Yes	Yes	No	No	No		Yes	No	No	No		1	yes_complication		2	3	1	2	1	2	2	2	2	2	3	2	1	2	3	1	1	1.88	NO		4	NO		108
			250	63	old	female	Chinese	3	primary		Yes	Yes	No	No	No		No	No	No	No		0	no_complication		1	2	1	1	1	1	2	1	1	2	1	1	1	1	1	2	1	1.24	NO		8	NO		96
			251	77	old	female	Chinese	2	primary		Yes	Yes	No	No	No		No	No	No	No		0	no_complication		1	1	1	1	1	1	1	1	1	1	1	1	1	1	1	1	1	1	NO		0	NO		110
			252	69	old	male	Chinese	5	primary		No	Yes	No	No	No		No	No	No	No		0	no_complication		2	1	1	3	1	2	1	2	1	3	2	2	3	3	2	2	3	2	NO		0	NO		118
			253	64	old	female	Indian	8	primary		Yes	Yes	Yes	No	No		Yes	No	No	No		1	yes_complication		3	3	1	2	1	1	1	1	1	2	2	2	1	1	2	1	1	1.53	NO		7	NO		102
			254	50	young	male	Indian	2	primary		Yes	Yes	Yes	No	No		No	No	No	No		0	no_complication		1	1	1	1	1	1	1	1	1	1	1	1	1	1	1	1	1	1	NO		3	NO		119
			255	72	old	female	Indian	4	primary		Yes	No	No	No	No		No	No	No	No		0	no_complication		1	1	1	1	1	1	2	1	2	2	2	1	2	1	2	1	1	1.35	NO		5	NO		67
			256	50	young	male	Indian	2	secondary		Yes	No	No	No	No		No	No	No	No		0	no_complication		1	2	1	3	1	1	1	1	1	1	1	3	3	1	1	2	1	1.47	NO		3	NO		117
			257	55	young	female	Indian	10	secondary		Yes	Yes	No	No	No		No	No	No	No		0	no_complication		1	1	2	1	3	1	1	1	3	1	2	1	2	3	2	3	1	1.71	NO		6	NO		90
			258	40	young	female	Indian	2	primary		Yes	No	No	No	No		No	No	No	No		0	no_complication		2	2	1	1	1	1	1	1	1	1	1	1	1	2	1	1	2	1.24	NO		5	NO		123
			259	61	old	female	Indian	2	secondary		Yes	Yes	No	No	No		No	No	No	No		0	no_complication		1	1	1	2	2	1	1	1	3	1	1	1	2	3	1	1	2	1.47	NO		4	NO		103
			260	63	old	male	Indian	7	primary		Yes	Yes	No	No	No		No	No	No	No		0	no_complication		1	1	1	3	2	2	1	1	1	2	2	1	2	1	1	2	1	1.47	NO		5	NO		113
			261	42	young	female	Indian	2	primary		Yes	Yes	No	No	No		No	No	No	No		0	no_complication		3	2	1	1	2	3	3	2	1	1	1	1	1	1	2	2	2	1.71	NO		5	NO		107
			262	43	young	female	Indian	9	primary		Yes	Yes	Yes	No	No		Yes	No	No	No		1	yes_complication		1	2	3	2	1	2	1	1	3	1	3	1	2	3	3	1	3	1.94	NO		6	NO		105
			263	48	young	male	Indian	2	secondary		Yes	No	No	No	No		Yes	No	No	No		1	yes_complication		2	1	3	2	2	2	1	1	1	2	3	1	2	1	3	3	1	1.82	NO		4	NO		114
			264	48	young	male	Indian	8	secondary		Yes	Yes	No	No	No		No	No	No	No		0	no_complication		1	2	1	3	1	2	2	3	1	1	1	3	1	1	1	1	1	1.53	NO		3	NO		101
			265	62	old	male	Indian	2	primary		Yes	No	No	No	No		Yes	No	No	No		2	yes_complication		6	6	3	6	4	1	1	1	3	3	3	6	3	3	3	3	3	3.41	DISTRESS		6	NO		86
			266	56	young	male	Indian	2	primary		Yes	Yes	No	No	No		No	No	No	No		0	no_complication		2	2	2	1	2	1	1	1	2	2	1	1	2	2	1	2	2	1.59	NO		6	NO		132
			267	45	young	male	Indian	2	secondary		Yes	Yes	No	No	No		No	No	No	No		0	no_complication		5	1	2	3	1	5	1	1	2	1	2	2	2	2	2	2	2	2.12	DISTRESS		2	NO		120
			268	58	young	female	Indian	10	secondary		Yes	Yes	Yes	No	No		No	No	No	No		0	no_complication		3	3	1	2	2	1	1	1	1	2	2	1	2	1	1	3	1	1.65	NO		5	NO		103
			269	45	young	male	Indian	9	primary		No	Yes	No	No	No		No	No	No	No		0	no_complication		1	1	1	2	3	1	1	1	2	1	1	1	1	2	1	2	2	1.41	NO		5	NO		110
			270	67	old	male	Indian	11	primary		Yes	No	No	No	No		No	Yes	No	No		1	yes_complication		2	1	1	1	1	1	3	1	1	1	1	1	3	1	1	2	1	1.35	NO		1	NO		126
			271	37	young	male	Indian	13	primary		Yes	Yes	No	No	No		No	No	No	No		0	no_complication		2	2	2	1	1	1	1	1	2	1	1	1	1	1	1	2	1	1.29	NO		5	NO		118
			272	70	old	female	Indian	9	secondary		Yes	Yes	No	No	No		No	No	No	No		0	no_complication		3	2	1	1	1	2	1	1	1	1	1	1	1	1	1	1	1	1.24	NO		1	NO		85
			273	75	old	male	Chinese	4	primary		Yes	Yes	No	No	No		Yes	No	No	No		1	yes_complication		1	1	1	1	1	1	1	1	1	1	1	1	1	1	1	1	1	1	NO		7	NO		93
			274	61	old	male	Indian	10	primary		Yes	No	No	No	No		No	Yes	Yes	No		3	yes_complication		1	1	1	1	1	1	1	2	1	1	1	1	1	1	1	2	1	1.12	NO		2	NO		120
			275	65	old	female	Indian	8	primary		Yes	Yes	No	No	No		No	No	No	No		0	no_complication		3	3	1	1	1	4	4	1	1	3	2	1	1	1	2	1	1	1.82	NO		2	NO		106
			276	66	old	female	Indian	11	primary		Yes	Yes	No	No	No		No	No	No	No		0	no_complication		1	1	1	1	1	1	1	1	1	1	1	1	1	1	1	1	1	1	NO		6	NO		109
			277	46	young	male	Chinese	7	secondary		Yes	Yes	No	No	No		Yes	No	No	No		1	yes_complication		2	1	1	1	1	1	1	1	1	1	1	1	1	1	1	1	1	1.06	NO		1	NO		134
			278	51	young	female	Chinese	7	primary		Yes	No	Yes	No	No		No	No	No	No		0	no_complication		3	1	1	1	1	1	1	1	1	1	1	1	1	1	1	1	1	1.12	NO		4	NO		89
			279	46	young	female	Indian	3	primary		Yes	Yes	No	No	No		No	No	No	No		0	no_complication		1	2	1	2	3	1	2	1	3	3	1	1	2	1	1	1	1	1.59	NO		5	NO		115
			280	50	young	male	Indian	2	secondary		Yes	Yes	No	No	No		No	No	No	No		0	no_complication		5	1	1	1	1	1	1	1	1	1	1	1	22	1	1	1	1	2.47	NO		9	NO		135
			281	62	old	male	Indian	3	primary		Yes	Yes	No	No	No		No	No	No	No		0	no_complication		1	2	2	1	1	1	1	2	1	2	1	1	2	1	1	2	1	1.35	NO		2	NO		70
			282	54	young	female	Chinese	9	primary		Yes	No	No	No	No		No	No	No	No		0	no_complication		1	1	1	1	1	1	1	1	1	1	1	1	1	1	1	1	1	1	NO		3	NO		120
			283	63	old	female	Indian	13	primary		Yes	Yes	No	No	No		Yes	No	No	No		1	yes_complication		1	1	1	1	1	1	1	1	1	1	1	2	1	1	1	1	2	1.12	NO		4	NO		125
			284	56	young	female	Indian	7	secondary		Yes	No	No	No	No		No	No	No	No		0	no_complication		1	1	1	1	2	1	1	1	1	1	1	1	1	1	1	1	1	1.06	NO		3	NO		133
			285	66	old	male	Chinese	3	primary		Yes	No	No	No	No		No	No	No	No		0	no_complication		1	1	2	1	2	1	1	1	1	1	1	1	2	1	1	1	1	1.18	NO		4	NO		122
			286	46	young	male	Chinese	2	primary		Yes	Yes	No	No	No		No	Yes	No	No		1	yes_complication		1	1	1	1	1	1	1	1	1	1	1	1	1	1	1	1	1	1	NO		4	NO		126
			287	43	young	female	Indian	3	secondary		Yes	Yes	No	No	No		No	No	No	No		0	no_complication		1	1	1	1	2	1	1	1	1	1	2	2	1	1	1	1	2	1.24	NO		3	NO		130
			288	64	old	male	Indian	2	primary		Yes	Yes	No	No	No		No	Yes	No	No		1	yes_complication		1	1	1	1	1	1	1	1	1	1	1	1	1	1	1	1	1	1	NO		3	NO		112
			289	53	young	male	Indian	15	secondary		Yes	Yes	No	No	No		No	No	No	No		0	no_complication		1	1	1	1	1	1	1	1	1	1	1	1	1	1	1	1	1	1	NO		3	NO		112
			290	50	young	female	Indian	2	primary		Yes	Yes	No	No	No		No	No	No	No		0	no_complication		1	1	1	1	1	1	1	1	1	1	1	1	1	1	1	1	1	1	NO		3	NO		84
			291	52	young	female	Indian	2	secondary		Yes	Yes	No	No	No		No	No	No	No		0	no_complication		1	1	1	1	1	1	1	1	1	1	1	1	1	1	1	1	1	1	NO		3	NO		84
			292	62	old	male	Chinese	2	primary		Yes	Yes	No	No	No		No	No	No	No		0	no_complication		1	1	1	1	1	1	1	1	1	1	1	1	1	1	1	1	1	1	NO		3	NO		112
			293	50	young	female	Indian	9	primary		Yes	Yes	No	No	No		No	No	No	No		0	no_complication		1	1	1	1	1	1	1	1	1	1	1	1	1	1	1	1	1	1	NO		4	NO		98
			294	52	young	female	Indian	11	secondary		Yes	Yes	No	No	No		No	No	No	No		0	no_complication		1	1	1	1	1	1	1	1	1	1	1	1	1	1	1	1	1	1	NO		3	NO		84
			295	57	young	female	Malay	2	secondary		Yes	No	No	No	No		No	No	No	No		0	no_complication		1	1	1	1	1	1	1	1	1	1	1	1	1	1	1	1	1	1	NO		3	NO		133
			296	45	young	female	Indian	2	primary		Yes	Yes	No	No	No		No	No	No	No		0	no_complication		2	2	1	1	1	2	1	1	1	1	1	1	1	1	1	1	1	1.18	NO		4	NO		84
			297	51	young	female	Indian	10	primary		Yes	Yes	Yes	No	No		No	No	No	No		0	no_complication		1	1	1	1	1	1	1	1	1	1	1	1	1	1	1	1	1	1	NO		3	NO		100
			298	47	young	female	Malay	3	secondary		Yes	Yes	No	No	No		No	No	No	No		0	no_complication		1	1	1	1	1	1	1	1	1	1	1	1	1	1	1	1	1	1	NO		2	NO		126
			299	48	young	female	Malay	8	secondary		Yes	Yes	No	No	No		No	No	No	No		0	no_complication		1	1	1	1	1	1	1	1	1	1	1	1	1	1	1	1	1	1	NO		4	NO		120
			300	35	young	male	Malay	2	secondary		Yes	No	No	No	No		No	No	No	No		0	no_complication		1	1	2	1	2	1	1	1	2	1	1	1	1	1	1	1	1	1.18	NO		5	NO		114
			301	48	young	male	Indian	2	primary		No	Yes	No	No	No		No	No	No	No		0	no_complication		1	1	1	1	1	1	1	1	1	1	1	1	1	1	1	1	1	1	NO		6	NO		122
			302	61	old	female	Malay	9	primary		Yes	Yes	No	No	No		No	No	No	No		0	no_complication		1	1	1	1	1	1	1	1	1	1	1	1	1	1	1	1	1	1	NO		5	NO		117
			303	43	young	female	Chinese	2	tertiary		Yes	Yes	No	No	No		No	No	No	No		0	no_complication		5	1	1	1	1	1	1	1	1	1	1	1	1	1	1	1	1	1.24	NO		3	NO		121
			304	56	young	female	Malay	2	secondary		Yes	No	No	No	No		No	No	No	No		0	no_complication		1	1	1	1	1	1	1	1	2	1	1	1	1	2	1	1	1	1.12	NO		3	NO		121
			305	52	young	male	Malay	10	secondary		Yes	Yes	No	No	No		No	No	No	No		0	no_complication		1	1	1	1	1	1	1	1	1	1	1	1	1	1	1	1	1	1	NO		3	NO		121
			306	37	young	female	Malay	18	secondary		No	Yes	No	No	No		No	No	No	No		0	no_complication		1	1	1	1	1	1	1	1	2	1	1	1	1	1	1	1	1	1.06	NO		3	NO		126
			307	55	young	male	Malay	6	secondary		Yes	No	No	No	No		No	No	No	No		0	no_complication		1	1	2	1	1	1	1	1	2	1	1	1	1	1	1	1	1	1.12	NO		8	NO		129
			308	41	young	male	Malay	8	primary		Yes	Yes	No	No	No		Yes	No	No	No		1	yes_complication		1	1	1	1	1	1	1	1	1	1	1	1	1	1	1	1	1	1	NO		3	NO		126
			309	58	young	female	Malay	2	secondary		Yes	Yes	No	No	No		No	No	Yes	No		1	yes_complication		1	1	1	1	1	1	1	1	1	1	1	1	1	1	1	1	1	1	NO		3	NO		122
			310	68	old	female	Chinese	10	secondary		Yes	Yes	No	No	No		No	No	No	No		0	no_complication		1	1	1	1	1	1	1	1	1	1	1	1	1	1	1	1	1	1	NO		4	NO		117
			311	54	young	male	Indian	9	secondary		Yes	No	No	No	No		No	No	No	No		0	no_complication		1	1	1	1	1	1	1	1	1	1	1	1	1	1	1	1	1	1	NO		6	NO		118
			312	63	old	female	Indian	2	primary		Yes	No	No	No	No		No	No	No	No		0	no_complication		1	1	1	1	1	1	1	1	1	1	1	1	1	1	1	1	1	1	NO		2	NO		116
			313	47	young	male	Malay	4	secondary		Yes	Yes	No	No	No		Yes	No	No	No		1	yes_complication		1	1	1	1	1	1	2	1	1	1	1	1	1	1	1	1	1	1.06	NO		8	NO		108
			314	59	young	female	Malay	11	primary		Yes	No	No	No	No		No	No	No	No		0	no_complication		2	1	1	1	2	1	1	1	2	1	1	1	1	2	1	2	2	1.35	NO		4	NO		130
			315	48	young	male	Malay	13	secondary		Yes	Yes	No	No	No		No	No	No	No		1	yes_complication		5	4	1	3	4	5	4	4	1	2	2	4	3	1	2	3	1	2.88	NO		3	NO		117
			316	63	old	male	Malay	19	secondary		Yes	No	No	No	No		Yes	No	No	No		1	yes_complication		2	2	2	4	2	2	1	2	1	1	4	2	4	2	2	2	2	2.18	NO		6	NO		113
			317	63	old	male	Chinese	2	primary		Yes	No	No	No	No		No	No	No	No		0	no_complication		2	1	1	3	4	2	1	3	1	2	1	3	3	1	1	2	2	1.94	NO		7	NO		103
			318	63	old	female	Malay	3	secondary		Yes	Yes	No	No	No		No	No	No	No		0	no_complication		2	1	1	2	2	2	1	4	1	3	2	3	2	1	2	2	3	2	NO		4	NO		120
			319	54	young	female	Malay	11	primary		Yes	No	No	No	No		No	No	No	No		0	no_complication		2	3	2	2	1	2	3	3	1	2	2	3	2	3	2	2	2	2.18	NO		6	NO		103
			320	28	young	male	Malay	2	secondary		Yes	Yes	No	No	No		No	No	No	No		0	no_complication		2	1	3	2	1	2	1	3	1	1	2	2	2	1	2	2	2	1.76	NO		3	NO		122
			321	51	young	male	Malay	2	tertiary		Yes	Yes	No	No	No		No	No	No	No		0	no_complication		1	1	1	1	1	1	1	1	1	1	1	1	1	1	2	1	1	1.06	NO		4	NO		123
			322	59	young	female	Chinese	2	tertiary		Yes	Yes	No	No	No		No	No	No	No		0	no_complication		1	2	1	2	2	1	2	1	2	1	1	1	2	1	2	2	1	1.47	NO		3	NO		130
			323	75	old	female	Malay	2	primary		Yes	No	No	No	No		No	No	No	No		0	no_complication		4	3	2	3	3	2	2	3	3	2	2	3	2	2	2	2	2	2.47	NO		5	NO		74
			324	71	old	female	Chinese	24	primary		Yes	No	No	No	No		No	No	No	No		0	no_complication		2	2	1	1	1	1	1	1	1	2	2	1	1	1	1	1	1	1.24	NO		8	NO		64
			325	56	young	female	Malay	10	tertiary		Yes	No	No	No	No		No	No	No	No		0	no_complication		2	2	1	4	1	1	1	1	1	1	5	1	2	1	2	1	1	1.65	NO		3	NO		132
			326	77	old	male	Malay	12	primary		Yes	Yes	No	No	No		No	No	No	No		0	no_complication		3	2	2	1	2	2	1	2	2	3	2	2	3	1	3	2	1	2	NO		9	NO		101
			327	50	young	female	Malay	2	primary		Yes	Yes	No	No	No		No	No	No	No		0	no_complication		1	1	1	1	1	1	1	1	1	2	2	1	1	1	1	1	1	1.12	NO		4	NO		110
			328	65	old	female	Malay	7	primary		Yes	Yes	No	No	No		No	Yes	No	No		1	yes_complication		1	2	1	4	2	1	1	1	1	2	2	1	1	1	1	1	1	1.41	NO		3	NO		129
			329	59	young	female	Malay	16	secondary		Yes	Yes	No	No	No		No	No	No	No		0	no_complication		5	4	4	2	3	1	2	4	2	2	4	2	2	1	3	3	1	2.65	NO		1	NO		92
			330	44	young	male	Malay	2	primary		Yes	No	No	No	No		Yes	No	No	No		1	yes_complication		3	3	1	2	3	2	1	2	2	5	2	2	1	2	1	1	2	2.06	NO		7	NO		109
			331	59	young	female	Malay	19	primary		Yes	No	No	No	No		No	No	No	No		0	no_complication		1	1	1	1	1	1	1	1	1	1	1	1	1	1	1	1	1	1	NO		0	NO		121
			332	64	old	male	Malay	8	secondary		Yes	No	No	No	No		No	No	No	No		0	no_complication		3	4	2	1	1	2	2	1	1	4	4	1	2	2	2	2	2	2.12	NO		8	NO		124
			333	61	old	female	Malay	7	primary		Yes	Yes	No	No	No		No	No	No	No		0	no_complication		1	5	4	2	4	1	2	1	2	3	2	2	3	3	4	4	6	2.88	NO		9	NO		64
			334	55	young	male	Malay	6	tertiary		Yes	Yes	No	No	No		No	Yes	No	No		1	yes_complication		4	4	2	3	3	2	2	2	2	3	3	3	2	2	1	2	2	2.47	NO		4	NO		110
			335	53	young	female	Malay	9	primary		Yes	Yes	No	No	No		No	No	No	No		0	no_complication		1	1	4	2	3	1	2	1	1	2	1	1	2	1	1	3	2	1.71	NO		3	NO		127
			336	47	young	female	Malay	4	secondary		Yes	Yes	No	No	No		No	No	No	No		0	no_complication		2	1	1	2	2	2	2	1	2	2	1	1	2	1	1	1	1	1.47	NO		3	NO		127
			337	67	old	male	Malay	4	tertiary		Yes	Yes	No	No	No		No	No	No	No		0	no_complication		1	1	1	1	1	1	1	1	1	1	1	1	1	1	1	1	1	1	NO		3	NO		124
			338	61	old	female	Malay	4	primary		Yes	Yes	No	No	No		No	No	No	No		0	no_complication		1	1	1	1	1	1	1	1	1	1	1	1	1	1	1	1	1	1	NO		3	NO		111
			339	52	young	male	Malay	10	primary		Yes	Yes	No	No	No		No	Yes	No	No		1	yes_complication		2	3	6	6	5	1	3	1	1	1	1	2	6	1	3	1	1	2.59	NO		6	NO		55
			340	63	old	female	Malay	16	primary		Yes	Yes	No	No	No		No	No	No	No		0	no_complication		1	5	1	6	1	5	2	1	1	1	1	5	4	5	1	2	5	2.76	NO		7	NO		111
			341	57	young	male	Malay	2	secondary		Yes	Yes	No	No	No		No	No	No	No		0	no_complication		1	2	3	1	2	1	1	2	3	1	1	2	1	2	1	1	1	1.53	NO		3	NO		140
			342	72	old	male	Malay	5	tertiary		Yes	No	No	No	No		No	Yes	No	No		1	yes_complication		2	4	4	4	4	5	1	4	3	3	2	2	2	3	2	4	1	2.94	NO		3	NO		112
			343	67	old	male	Malay	2	secondary		Yes	No	No	No	No		No	No	No	No		0	no_complication		1	6	6	3	2	5	5	2	1	3	5	2	3	5	1	5	5	3.53	DISTRESS		2	NO		103
			344	60	old	female	Malay	14	primary		Yes	Yes	No	No	No		No	No	No	No		0	no_complication		3	3	1	3	2	2	3	2	2	3	2	2	3	1	2	3	1	2.24	NO		4	NO		104
			345	61	old	female	Malay	5	primary		Yes	No	No	No	No		No	No	No	No		0	no_complication		4	5	1	3	3	5	1	1	3	3	2	3	6	2	1	1	1	2.65	NO		9	NO		76
			346	59	young	female	Chinese	10	primary		Yes	No	No	No	No		No	No	No	No		0	no_complication		4	2	1	1	1	3	1	3	1	1	1	5	3	3	1	2	2	2.06	NO		6	NO		47
			347	65	old	female	Malay	3	primary		Yes	No	No	Yes	No		No	No	No	No		0	no_complication		3	3	1	3	4	2	4	1	5	3	2	4	5	6	1	1	6	3.18	DISTRESS		8	NO		104
			348	42	young	female	Malay	5	primary		Yes	Yes	No	No	No		No	No	No	No		0	no_complication		1	1	1	1	1	1	1	1	1	1	1	1	1	1	1	1	1	1	NO		3	NO		125
			349	52	young	female	Malay	3	primary		Yes	No	No	No	No		No	No	No	No		0	no_complication		1	1	1	1	1	1	1	1	1	1	1	1	1	1	1	1	1	1	NO		3	NO		123
			350	36	young	female	Malay	3	secondary		Yes	Yes	No	No	No		No	No	No	No		0	no_complication		1	3	2	1	1	2	2	2	1	1	1	1	2	1	1	1	1	1.41	NO		9	NO		112
			351	31	young	male	Malay	3	secondary		No	No	No	Yes	No		No	No	No	No		0	no_complication		2	1	1	1	1	1	1	1	1	3	3	1	1	1	1	1	1	1.29	NO		3	NO		103
			352	59	young	female	Malay	14	primary		Yes	Yes	No	No	No		No	No	No	No		0	no_complication		2	1	4	1	1	1	1	3	2	2	2	2	1	3	3	1	4	2	NO		5	NO		79
			353	50	young	female	Malay	11	primary		Yes	Yes	No	No	No		No	No	No	No		0	no_complication		1	1	1	1	1	1	1	1	1	1	1	1	1	1	1	1	1	1	NO		5	NO		101
			354	73	old	male	Chinese	18	primary		Yes	No	No	No	No		No	Yes	No	No		1	yes_complication		2	1	5	5	4	2	4	5	1	3	4	5	6	6	5	6	6	4.12	DISTRESS		9	NO		56
			355	53	young	male	Malay	12	tertiary		Yes	No	No	Yes	No		No	No	No	No		0	no_complication		3	2	5	4	3	2	3	2	4	4	4	3	4	3	4	4	4	3.41	DISTRESS		9	NO		69
			356	47	young	female	Malay	6	primary		No	No	No	Yes	No		Yes	No	No	No		1	yes_complication		5	4	4	4	3	3	5	2	1	3	2	3	2	3	2	3	5	3.18	DISTRESS		13	DEPRESSION		56
			357	39	young	female	Malay	4	tertiary		Yes	Yes	No	No	No		No	No	No	No		0	no_complication		4	2	4	4	6	2	2	1	6	5	3	1	6	3	3	3	5	3.53	DISTRESS		11	DEPRESSION		70
			358	40	young	female	Malay	2	secondary		Yes	Yes	No	No	No		No	No	No	No		0	no_complication		1	3	6	6	5	6	4	5	4	6	5	6	1	5	5	4	5	4.53	DISTRESS		6	NO		121
			359	61	old	female	Malay	6	tertiary		Yes	Yes	No	No	No		No	No	No	No		0	no_complication		1	2	3	3	2	1	1	1	1	1	1	1	1	1	1	2	1	1.41	NO		5	NO		107
			360	58	young	female	Malay	2	secondary		Yes	No	No	No	No		Yes	No	No	No		1	yes_complication		1	1	1	4	1	2	3	2	2	3	1	3	3	2	1	2	1	1.94	NO		10	DEPRESSION		74
			361	74	old	male	Malay	4	primary		Yes	Yes	No	No	No		No	No	No	No		0	no_complication		4	1	5	3	1	4	1	1	2	6	6	1	2	1	6	1	1	2.71	NO		3	NO		105
			362	54	young	male	Malay	7	secondary		Yes	Yes	No	No	No		No	No	No	No		0	no_complication		3	4	4	4	2	3	2	2	3	4	4	2	3	3	3	2	3	3	DISTRESS		4	NO		83
			363	46	young	female	Malay	3	secondary		Yes	No	No	Yes	No		No	No	No	No		0	no_complication		1	1	1	5	1	1	1	1	1	1	3	3	2	3	1	1	2	1.71	NO		6	NO		101
			364	46	young	female	Malay	2	primary		Yes	Yes	No	No	No		No	No	No	No		0	no_complication		1	4	4	2	3	1	4	2	4	4	5	1	1	4	5	4	5	3.18	DISTRESS		9	NO		74
			365	56	young	female	Malay	2	secondary		Yes	No	No	No	No		No	No	No	No		0	no_complication		1	1	1	1	1	1	1	1	1	1	1	1	1	1	1	1	1	1	NO		3	NO		126
			366	46	young	male	Malay	5	tertiary		No	No	No	Yes	No		No	No	No	No		0	no_complication		1	1	1	1	1	1	1	1	1	1	1	1	1	1	1	1	1	1	NO		12	DEPRESSION		45
			367	68	old	female	Malay	3	secondary		Yes	No	No	No	No		No	No	No	No		0	no_complication		2	3	2	1	2	3	3	1	1	4	3	1	2	2	3	1	2	2.12	NO		9	NO		6
			368	48	young	male	Malay	7	tertiary		Yes	No	No	Yes	No		Yes	No	No	No		1	yes_complication		3	3	2	2	4	3	3	1	5	4	4	1	2	5	4	3	5	3.18	DISTRESS		4	NO		89
			369	40	young	female	Malay	9	secondary		Yes	No	No	Yes	No		No	No	No	No		0	no_complication		4	4	3	4	5	2	2	2	3	3	4	4	5	5	2	3	2	3.35	DISTRESS		9	NO		89
			370	56	young	female	Malay	9	primary		Yes	Yes	No	No	No		No	No	No	No		0	no_complication		4	3	3	3	3	4	3	4	3	3	4	4	3	3	4	3	3	3.35	DISTRESS		3	NO		113
			371	51	young	male	Chinese	4	primary		Yes	Yes	No	No	No		No	No	No	No		0	no_complication		2	1	1	1	1	2	1	1	1	1	1	1	1	1	1	1	1	1.12	NO		3	NO		106
[truncated: 12 more columns]
